# Supplementary material for: Synthesis of a task-specific imidazolium-based porous triazine polymer decorated with ultrafine Pd nanoparticles toward alcohol oxidation
Source: Royal Society of Chemistry journal article supplement (doi:10.1039/d1gc01338f), 2021-01-01
Supplement: d1gc01338f1.pdf [file d1gc01338f1.pdf]

# Green Chemistry

Electronic Supporting Information for

## Synthesis of Task-specific Imidazolium-based Porous Triazine Polymer Decorated with Ultrafine Pd Nanoparticles toward Alcohol Oxidation

*Yannan Mao,<sup>a</sup> Yongqing Shi,<sup>a</sup> Yatao Su,<sup>a</sup> Qi Shen,<sup>a</sup> Yuangong Zhang,<sup>b</sup> Xianling Wang,<sup>a</sup> Xin Wen,<sup>a,\*</sup>*

<sup>a</sup>Key Laboratory of Chemical Biology of Hebei Province, College of Chemistry and Environmental Science, Hebei University, Baoding 071002, China.

<sup>b</sup>College of Basic Medical Sciences, Hebei University, Baoding 071002, China.

\* Phone: +86-312-5079359; Fax: +86-312-5937102; E-mail address:

[wenxin767@hotmail.com](mailto:wenxin767@hotmail.com)

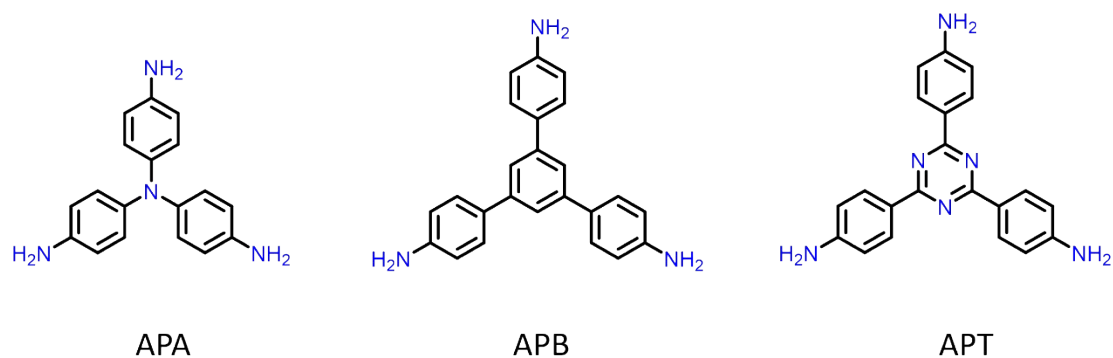

**Fig. S1** Molecular formulas for the synthesis of porous organic polymers.

**Table S1** Porous polymers prepared under different conditions and their physicochemical properties.

| Entry          |  |  | Solvent                        | $V$ (mL) | SSA<br>BET ( $\text{m}^2 \text{g}^{-1}$ ) | SSA<br>Langmuir<br>( $\text{m}^2 \text{g}^{-1}$ ) | $V_{\text{total}}^{\text{a}}$<br>( $\text{cm}^3 \text{g}^{-1}$ ) | $V_{\text{micro}}^{\text{b}}$<br>( $\text{cm}^3 \text{g}^{-1}$ ) |
|----------------|-------------------------------------------------------------------------------------|-------------------------------------------------------------------------------------|--------------------------------|----------|-------------------------------------------|---------------------------------------------------|------------------------------------------------------------------|------------------------------------------------------------------|
| 1              | APA                                                                                 | <b>2b</b>                                                                           | HOAc                           | 24       | 0                                         | 0                                                 | 0                                                                | 0                                                                |
| 2              | APB                                                                                 | <b>2b</b>                                                                           | HOAc                           | 24       | 0                                         | 0                                                 | 0                                                                | 0                                                                |
| 3              | APT                                                                                 | <b>2b</b>                                                                           | HOAc                           | 12       | 234                                       | 329                                               | 0.11                                                             | 0.096                                                            |
|                |                                                                                     |                                                                                     | DMSO                           | 12       |                                           |                                                   |                                                                  |                                                                  |
| 4              | APT                                                                                 | <b>2b</b>                                                                           | HCl                            | 24       | 12.0                                      | 16                                                | 0.018                                                            | 0.004                                                            |
| 5              | APT                                                                                 | <b>2b</b>                                                                           | H <sub>3</sub> PO <sub>4</sub> | 24       | 0                                         | 0                                                 | 0                                                                | 0                                                                |
| 6              | APT                                                                                 | <b>2b</b>                                                                           | HOAc                           | 24       | 177.0                                     | 251                                               | 0.33                                                             | 0.068                                                            |
| 7              | APT                                                                                 | <b>2b</b>                                                                           | HOAc                           | 24       | 147.0                                     | 203                                               | 0.32                                                             | 0.059                                                            |
| 8 <sup>a</sup> | APT                                                                                 | <b>2b</b>                                                                           | HOAc                           | 24       | 10                                        | 14                                                | 0.02                                                             | 0.004                                                            |
| 9 <sup>b</sup> | APT                                                                                 | <b>2b</b>                                                                           | HOAc                           | 24       | 147                                       | 203                                               | 0.32                                                             | 0.059                                                            |

<sup>a</sup>The preparation of IPTP was conducted under a microwave condition. <sup>b</sup>IPTP was collected by centrifugation and dried under vacuum, instead of dialysis and freeze drying.

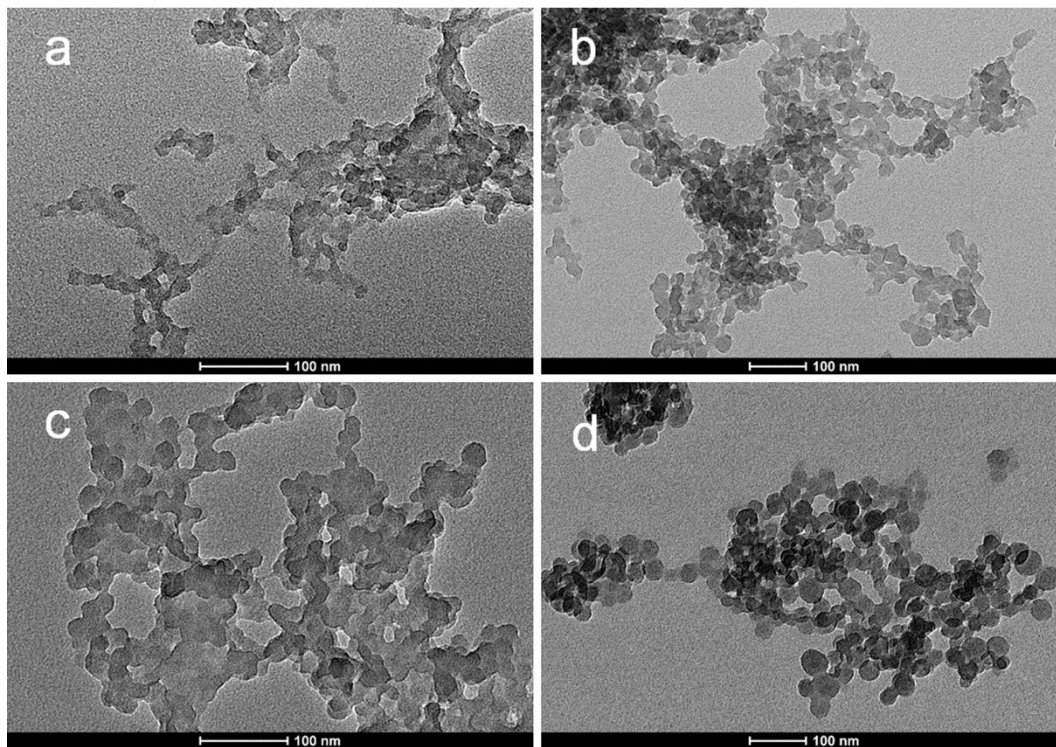

**Fig. S2** TEM images of (a) IPTP-4, (b) IPTP-5, (c) IPTP-6, and (d) IPTP-7.

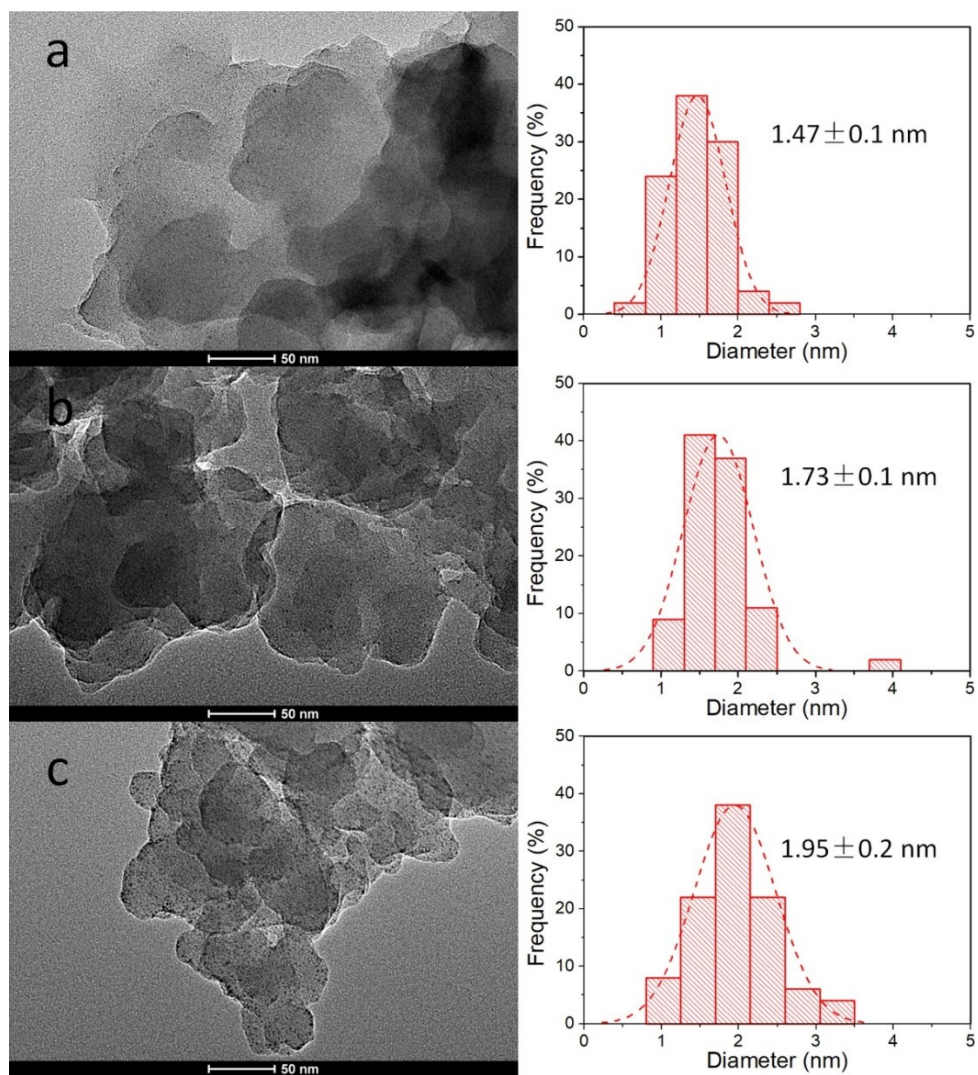

**Fig. S3** TEM images of (a) 0.25Pd/IPTP-2, (b) 4Pd/IPTP-2, and (c) 8Pd/IPTP-2.

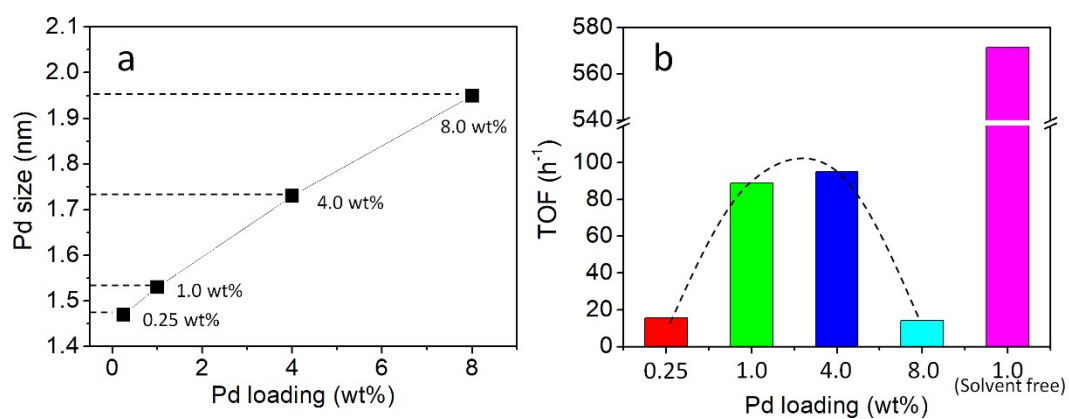

**Fig. S4** Relationship of the Pd loading with (a) particle size and (b) TOF values in the oxidation of BA to BzH.

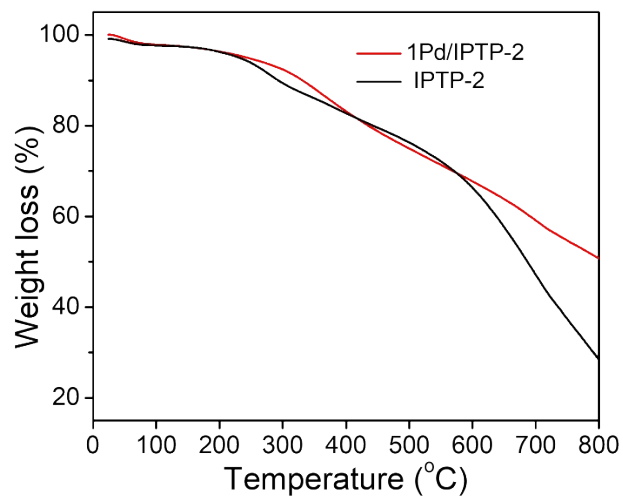

**Fig. S5** TGA traces of IPTP-2 and 1Pd/IPTP-2 from 20 °C to 800 °C.

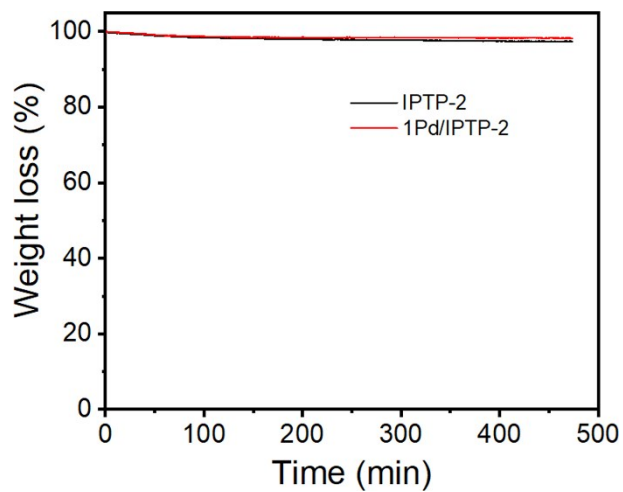

**Fig. S6** Isothermal TGA traces of IPTP-2 and 1Pd/IPTP-2 at 110 °C.

**Table S2** Comparison of the catalytic performance of 1Pd/IPTP-2 in benzyl alcohol oxidation with that of different reported catalysts

| Catalyst                                                        | Reaction conditions                                                             | TOF (h <sup>-1</sup> ) | Ref.             |
|-----------------------------------------------------------------|---------------------------------------------------------------------------------|------------------------|------------------|
| Au-Pd <sub>1.2</sub> @ $\gamma$ -Al <sub>2</sub> O <sub>3</sub> | 80 °C, H <sub>2</sub> O, air                                                    | 22.3                   | 1                |
| Pd@Cu(II)-MOF                                                   | 130 °C, xylene, air                                                             | 0.76                   | 2                |
| Au-Pd@PANI                                                      | 100 °C, toluene, NaOH, O <sub>2</sub>                                           | 16                     | 3                |
| Pd@U-E15                                                        | 90 °C, H <sub>2</sub> O, K <sub>2</sub> CO <sub>3</sub> , 1 atm O <sub>2</sub>  | 10.8                   | 4                |
| Pd@E10A20                                                       | 80 °C, toluene, K <sub>2</sub> CO <sub>3</sub> , 5 bar air                      | 15.6                   | 5                |
| Pd@MNP                                                          | 90 °C, toluene, K <sub>2</sub> CO <sub>3</sub> , air                            | 10.7                   | 6                |
| Pd@pol                                                          | 100 °C, H <sub>2</sub> O, K <sub>2</sub> CO <sub>3</sub> , 1 atm O <sub>2</sub> | 5.5                    | 7                |
| LDH/Pd(II)                                                      | 65 °C, H <sub>2</sub> O, pyridine, O <sub>2</sub> 30 mL/min                     | 31                     | 8                |
| <b>1Pd/IPTP-2</b>                                               | <b>110 °C, toluene, 1 atm O<sub>2</sub></b>                                     | <b>88.7</b>            | <b>This work</b> |
| Pd/NaX zeolite                                                  | 100 °C, solvent free, O <sub>2</sub> 3 mL/min                                   | 626                    | 9                |
| Au-Pd/TiO <sub>2</sub>                                          | 90 °C, solvent free, O <sub>2</sub> 1 atm                                       | 589                    | 10               |
| Pd/MagSBA                                                       | 85 °C, solvent free, O <sub>2</sub> 1 atm                                       | 633                    | 11               |
| Pd(2wt%)/NaTNT                                                  | 120 °C, solvent free, air 1atm                                                  | 205                    | 12               |
| Pd/Fe <sub>3</sub> O <sub>4</sub> @CeO <sub>2</sub>             | 100 °C, solvent free, O <sub>2</sub> 20 mL/min                                  | 443.5                  | 13               |
| Pd/SiO <sub>2</sub>                                             | 70 °C, solvent free, O <sub>2</sub> 3 mL/min                                    | 26                     | 14               |
| <b>1Pd/IPTP-2</b>                                               | <b>solvent free, 110 °C</b>                                                     | <b>751.8</b>           | <b>This work</b> |

## References

- 1 W. Zhang, Z. Xiao, J. Wang, W. Fu, R. Tan, D. Yin, *ChemCatChem.*, 2019, **11**, 1779-1788.
- 2 G. Chen, J. Wang, F. Jin, M. Liu, C. Zhao, Y. Li, Y. Dong, *Inorg. Chem.*, 2016, **55**, 3058-3064.

- 3 S. Marx, A. Baiker, *J. Phys. Chem. C.*, 2009, **113**, 6191-6201.
- 4 B. Karimi, M. Khorasani, H. Vali, C. Vargas, R. Luque, *ACS Catal.*, 2015, **5**, 4189-4200.
- 5 A. Benyounes, S. Louisia, R. Axet, Z. Mahfoud, M. Kacimi, P. Serp, *Catal. Today.*, 2015, **249**, 137-144.
- 6 D. Wang, C. Deraedt, L. Salmon, C. Labrugère, L. Etienne, J. Ruiz, D. Astruc, *Chem. Eur. J.*, 2015, **21**, 6501-6510.
- 7 M. M. Dell'Anna, M. Mali, P. Mastroianni, P. Cotugno, A. Monopoli, *J. Mol. Catal. A: Chem.*, 2014, **386**, 114-119.
- 8 M. Sahoo, K. M. Parida, *Appl. Catal. A: Gen.*, 2013, **460**, 36-45.
- 9 F. Li, Q. Zhang, Y. Wang, *Appl. Catal. A: Gen.*, 2008, **334**, 217-226.
- 10 Y. Hong, X. Jing, J. Huang, D. Sun, T. Wubah, F. Yang, M. Du, Q. Li, *ACS Sustain. Chem. & Eng.*, 2014, **2**, 1752-1759.
- 11 Y. Li, J. Huang, X. Hu, F. Lam, W. Wang, R. Luque, *J. Mol. Catal. A: Chem.*, 2016, **425**, 61-67.
- 12 D. Nepak, S. Darbha, *Catal. Commun.*, 2015, **58**, 149-153.
- 13 L. Kong, C. Wang, F. Gong, W. Zhu, Y. Zhong, X. Ye, F. Li, *Catal. Lett.*, 2016, **146**, 1321-1330.
- 14 J. Chen, Q. Zhang, Y. Wang, H. Wan, *Adv. Synth. & Catal.*, 2008, **350**, 453-464.

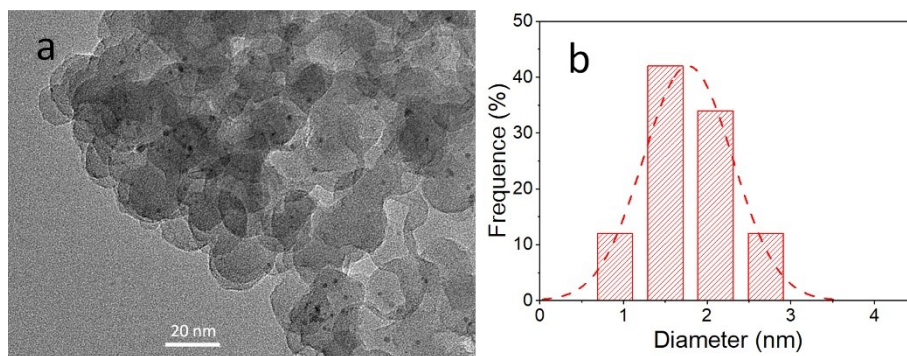

**Fig. S7** (a) TEM image and (b) the Pd particle size distribution of used 1Pd/IPTP-2.

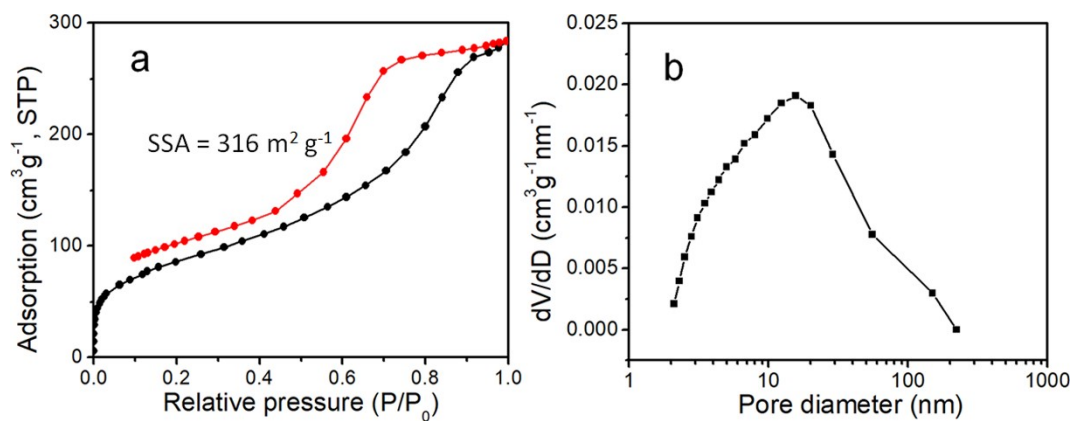

**Fig. S8** (a)  $N_2$  adsorption-desorption isotherm and (b) the pore size distribution of used 1Pd/IPTP-2.
